# Supplementary material
Source: Springer Nature journal article supplement (https://www.springermedizin.de/resource/supplementary/12982_2005_22_MOESM1_ESM.pdf/9604320)

MALES

Acute care

FEMALES

Rate per 1000

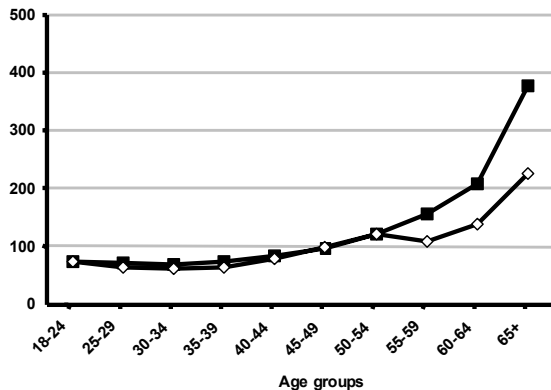

Rate per 1000

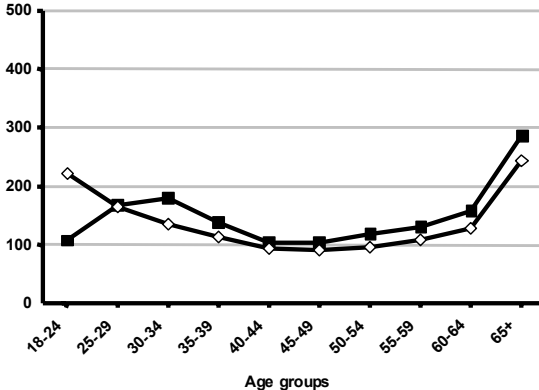

Rate per 1000

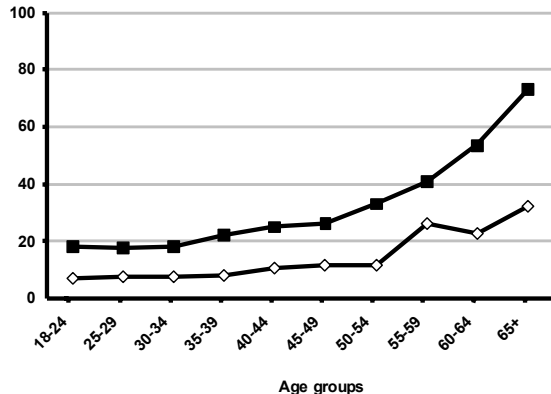

Rate per 1000

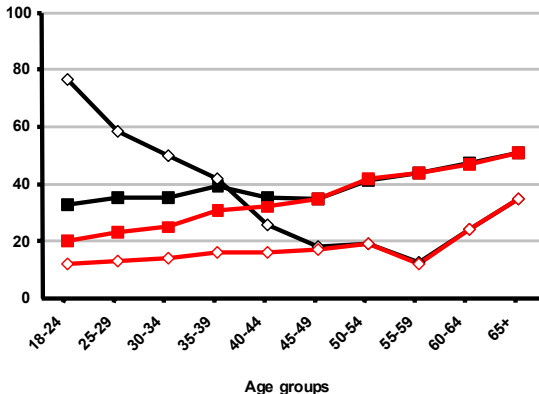

RESIDENTS LDCs

Supplement: MOESM1 [file 9604320]
